# Supplementary material
Source: HighWire-hosted journal article supplement (https://oem.bmj.com/content/76/12/881)
Supplement: inline-supplementary-material-1 [file inline-supplementary-material-1.pdf]

## Appendix 1. Linkage to Survey Questionnaires

| LIGHT/PR QUESTION                                                                        | WTC QUESTION                                                                                                               |
|------------------------------------------------------------------------------------------|----------------------------------------------------------------------------------------------------------------------------|
| Someone in your family was physically harmed/Friend was physically harmed                | Were relatives, friends or co-workers injured or harmed?                                                                   |
| Family member missing                                                                    | Family member missing                                                                                                      |
| Friend missing                                                                           | Friend missing                                                                                                             |
| Your life was in danger                                                                  | At any time during or after the storm, did you fear for your life or safety?                                               |
| The life of family member(s) in danger                                                   | The life of family member(s) in danger                                                                                     |
| Evacuated quickly with no time to prepare                                                | Evacuated quickly with no time to prepare                                                                                  |
| Prolonged separation from family                                                         | Prolonged separation from family                                                                                           |
| Great difficulty commuting to work/school due to transportation issues/gasoline shortage | Great difficulty commuting to work/school due to transportation issues/gasoline shortage                                   |
| Great difficulty accessing food for self/family                                          | Great difficulty accessing food for self/family                                                                            |
| Home damaged or destroyed                                                                | Which of the following best describes the degree of damage to your home as a result of Sandy?                              |
| You were physically harmed                                                               | The following questions are also about your experiences with Hurricane Sandy and its aftermath-Were you injured?           |
| Pet missing or dead                                                                      | Were your pets injured, harmed or lost?                                                                                    |
| Vehicle loss                                                                             | Did you experience the loss of Vehicle(s), such as a car, truck, motorcycle or boat due to Sandy?                          |
| Loss of power/electricity                                                                | Did you lose electricity at your home because of the storm?                                                                |
| Did you experience flooding in your home caused by Hurricane Sandy?                      | Did any part of your home flood because of Sandy?                                                                          |
| Displaced from home                                                                      | Did you evacuate?                                                                                                          |
| Unable to access necessary medical care                                                  | In the first 2 months after Sandy (November and December 2012), how much of a problem for you was getting medical care?    |
| Unable to access gasoline for vehicle                                                    | In the first 2 months after Sandy (November and December 2012), how much of a problem for you was getting gasoline?        |
| Witnessed death/injury (self or household)/Witnessed death/injury (other; ex. neighbor)  | At any time during or after the storm, did you witness anything terrible happen to someone?                                |
| Disaster resulted in unemployment (self) / Disaster resulted in unemployment (household) | Have you or anyone in your household lost a job, business, or other major source of household income as a result of Sandy? |

Appendix 2. Comparison of multivariable logistic regression models from the main analysis and the sensitivity analysis.

|                                                                    | <b>Overall (Main Analysis)<sup>b</sup></b> | <b>Males Only (Sensitivity Analysis)<sup>c</sup></b> |
|--------------------------------------------------------------------|--------------------------------------------|------------------------------------------------------|
| <b>Variable</b>                                                    | <b>aOR (95% CI)</b>                        | <b>aOR (95% CI)</b>                                  |
| <b>Responder Status</b>                                            |                                            |                                                      |
| Responder                                                          | <b>0.28 (0.17-0.46)</b>                    | <b>0.34 (0.19-0.61)</b>                              |
| Community Member (ref)                                             |                                            |                                                      |
| <b>Total Number of HS Exposures<sup>d</sup></b>                    | <b>1.34 (1.28-1.4)</b>                     | <b>1.37 (1.28-1.47)</b>                              |
| <b>Race</b>                                                        |                                            |                                                      |
| Other                                                              | <b>1.97 (1.47-2.64)</b>                    | <b>2.14 (1.36-3.38)</b>                              |
| White (ref)                                                        |                                            |                                                      |
| <b>Ethnicity</b>                                                   |                                            |                                                      |
| Hispanic                                                           | <b>1.99 (1.4-2.83)</b>                     | 1.27 (0.72-2.26)                                     |
| Non-Hispanic (ref)                                                 |                                            |                                                      |
| <b>Education</b>                                                   |                                            |                                                      |
| HS grad and lower                                                  | <b>1.79 (1.29-2.49)</b>                    | 1.22 (0.74-2.02)                                     |
| > some college (ref)                                               |                                            |                                                      |
| <b>Age<sup>e</sup></b>                                             | 1.06 (0.8-1.39)                            | 1 (0.99-1.01)                                        |
| <b>Elapsed Time between survey and Hurricane Sandy<sup>d</sup></b> | 1 (1-1.01)                                 | 1 (0.98-1.02)                                        |
| <b>Gender</b>                                                      |                                            |                                                      |
| Female                                                             | 1 (0.98-1.01)                              | -- (-----)                                           |
| Male (ref)                                                         |                                            | -- (-----)                                           |

Note. HS=high school. aOR=adjusted odds ratio; CI = confidence interval; ref=reference.

- Overall and males only models used 1509/1648 and 728/817 participants, respectively.
- aOR and 95% CI from the multivariable logistic regression model adjusted for elapsed time between survey and Hurricane Sandy and all demographics shown.
- aOR and 95% CI from the multivariable logistic regression model adjusted for and elapsed time between survey and Hurricane Sandy and all demographics shown except gender.
